# Supplementary material for: Cocrystallization of Febuxostat with Pyridine Coformers: Crystal Structural and Physicochemical Properties Analysis
Source: Hindawi journal article supplement (doi:10.1155/2021/3834368), 2021-12-16
Supplement: f1 [file 3834368.f1.docx]

**Supplementary Information**

Cocrystallization of febuxostat with pyridine coformers: Crystal structural and physicochemical properties analysis

***Contents:***

**Figure S1.** Library of coformers.

**Figure S2.** The Fourier maps of FEB-4HP-H2O salt.

**Figure S3.** PXRD patterns for experimental (black) and simulated (red) of FEB-BIP cocrystal.

**Figure S4.** PXRD patterns for experimental (black) and simulated (red) of FEB-3AP salt.

**Figure S5.** PXRD patterns for experimental (black) and simulated (red) of FEB-4HP-H2O salt.

**Figure S6.** PXRD analysis of the residual materials of FEB after 24h solubility in water.

**Figure S7.** PXRD analysis of the residual materials of FEB-BIP cocrystal after 24h solubility in water.

**Figure S8.** PXRD analysis of the residual materials of FEB-3AP salt after 24h solubility in water.

**Figure S9.** PXRD analysis of the residual materials of FEB-4HP-H2O salt after 24h solubility in water.

Table S1. The ΔpKa values of FEB and coformers used in this study.

Table S2. The UV standard curves and concentration ranges of FEB, FEB-BIP, FEB-3AP and FEB-4HP-H2O.

Table S3. Powder solubility test results (n=3).

Figure S1. Library of coformers.


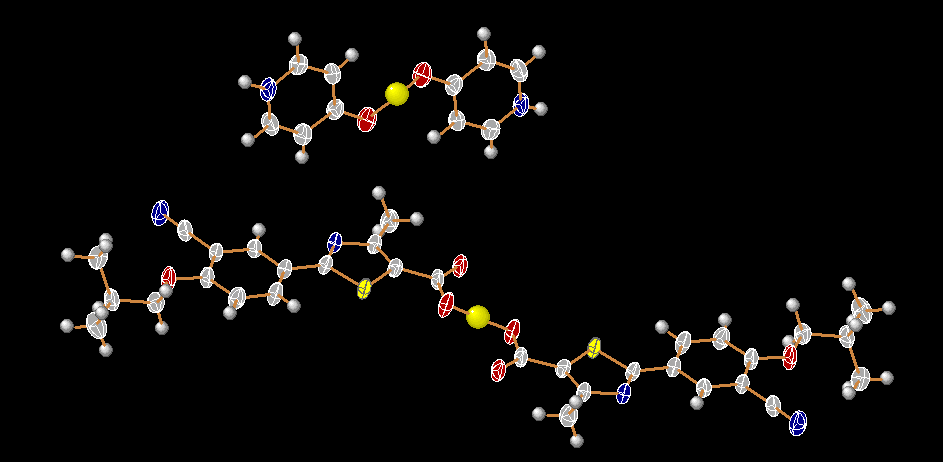


**Figure S2.** The Fourier maps of FEB-4HP-H2O salt.


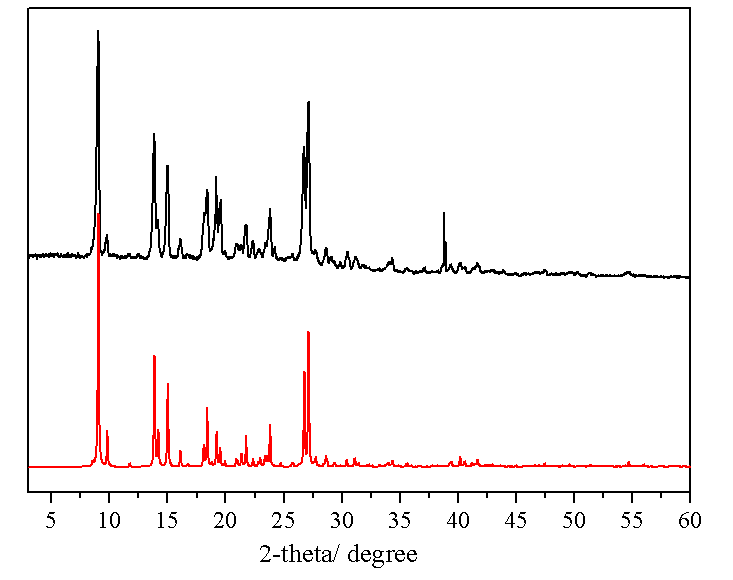


Figure S3. PXRD patterns for experimental (black) and simulated (red) of FEB-BIP cocrystal.


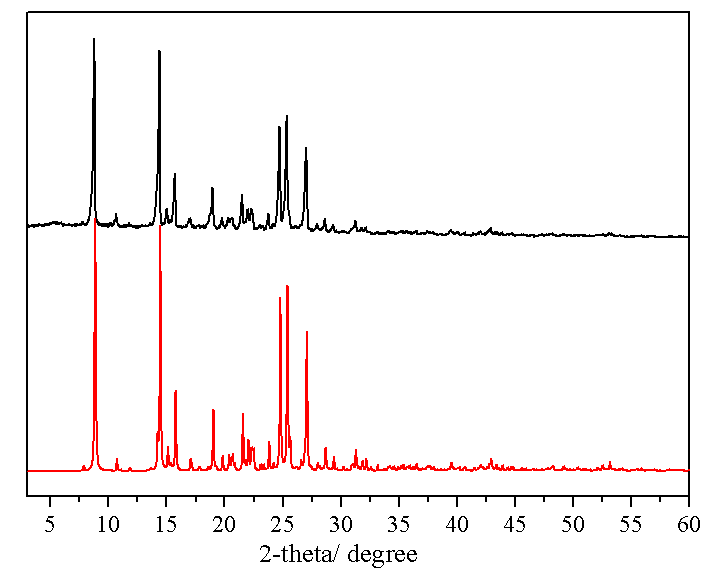


Figure S4. PXRD patterns for experimental (black) and simulated (red) of FEB-3AP salt.


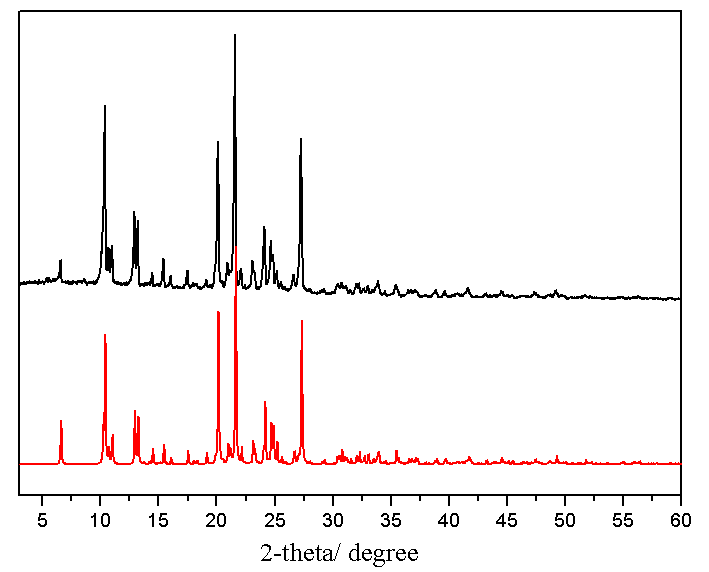


Figure S5. PXRD patterns for experimental (black) and simulated (red) of FEB-4HP-H2O salt.


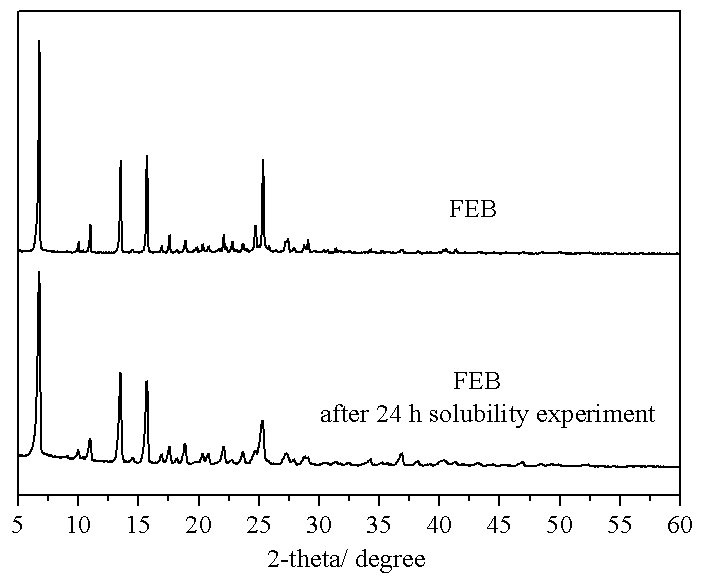


Figure S6. PXRD analysis of the residual materials of FEB after 24h solubility in water.


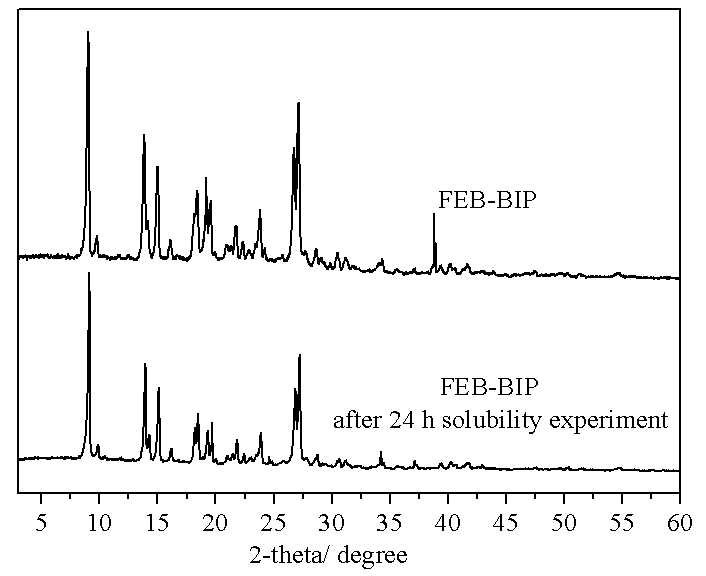


Figure S7. PXRD analysis of the residual materials of FEB-BIP cocrystal after 24h solubility in water.


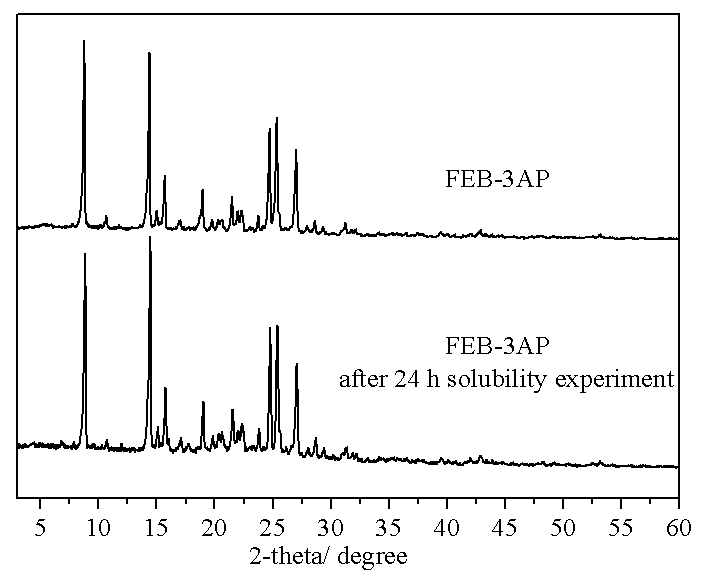


Figure S8. PXRD analysis of the residual materials of FEB-3AP salt after 24h solubility in water.


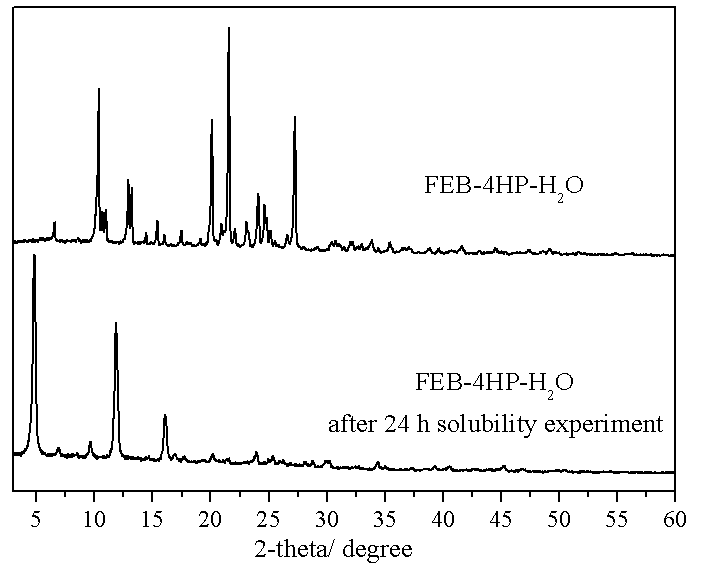


Figure S9. PXRD analysis of the residual materials of FEB-4HP-H2O salt after 24h solubility in water.

Table S1. The ΔpKa valuesα of FEB and coformers used in this study.

| Compound | pKa | ΔpKa |
| --- | --- | --- |
| FEB | 3.08 | － |
| BIP | 4.44 | 1.36 |
| BPY | 3.30 | 0.22 |
| 2AP | 6.84 | 3.76 |
| 3AP | 5.75 | 2.67 |
| 4AP | 8.95 | 5.87 |
| 2HP | 11.40 | 8.32 |
| 3HP | 5.26 | 2.18 |
| 4HP | 3.21 | 0.13 |
| 23DHP | 13.20 | 10.12 |
| 24DHP | 11.51 | 8.43 |
| 23DAP | 7.40 | 4.32 |
| 26DAP | 8.72 | 5.64 |

αpKa were calculated using Marvin 7.28.0, 2014, ChemAxon (<http://www.chemaxon.com>).

Table S2. The UV standard curves and concentration ranges of FEB, FEB-BIP, FEB-3AP and FEB-4HP-H2O.

| Compound | Standard curve equation  (A = absorbance, nm; C = concentration, mg/mL) | Concentration range  (mg/mL) |
| --- | --- | --- |
| FEB | A = 79.286C+0.004, R2=0.9997 | 0.003～0.014 |
| FEB-BIP | A = 58.475C-0.034, R2=0.9998 | 0.006～0.014 |
| FEB-3AP | A = 78.158C-0.029, R2=0.9996 | 0.002～0.010 |
| FEB-4HP-H2O | A = 60.351C-0.007, R2=0.9994 | 0.004～0.014 |

Table S3. Powder solubility test results (n=3)

| Sample in water | Solubility of API (mg/L) |
| --- | --- |
| FEB | 17.7 |
| FEB-BIP | 91.2 (×5.15) |
| FEB-3AP | 268.9 (×15.19) |
| FEB-4HP-H2O | - |
